# Supplementary material for: Microbial biosurfactant hydrogels with tunable rheology for precision 3D printing of soft scaffolds
Source: Royal Society of Chemistry journal article supplement (doi:10.1039/d5sm00248f), 2025-01-01
Supplement: d5sm00248f1.pdf [file d5sm00248f1.pdf]

## Supporting Information

### **Microbial Biosurfactant Hydrogels with Tunable Rheology for Precision 3D Printing of Soft Scaffolds**

Elizangela Hafemann Fragal<sup>a</sup>, Alexandre Poirier<sup>b</sup>, Didier Bleses<sup>a</sup>, Yan Faria Guimarães Silva,<sup>a</sup>  
Niki. Baccile<sup>b\*</sup>, Yahya Rharbi<sup>a\*</sup>

<sup>a</sup> Laboratoire Rhéologie Procédés (LRP), University Grenoble Alpes, F-38000 Grenoble, France

<sup>b</sup> Sorbonne Université, Centre National de la Recherche Scientifique, Laboratoire de Chimie de la Matière Condensée de Paris, LCMCP, F-75005 Paris, France

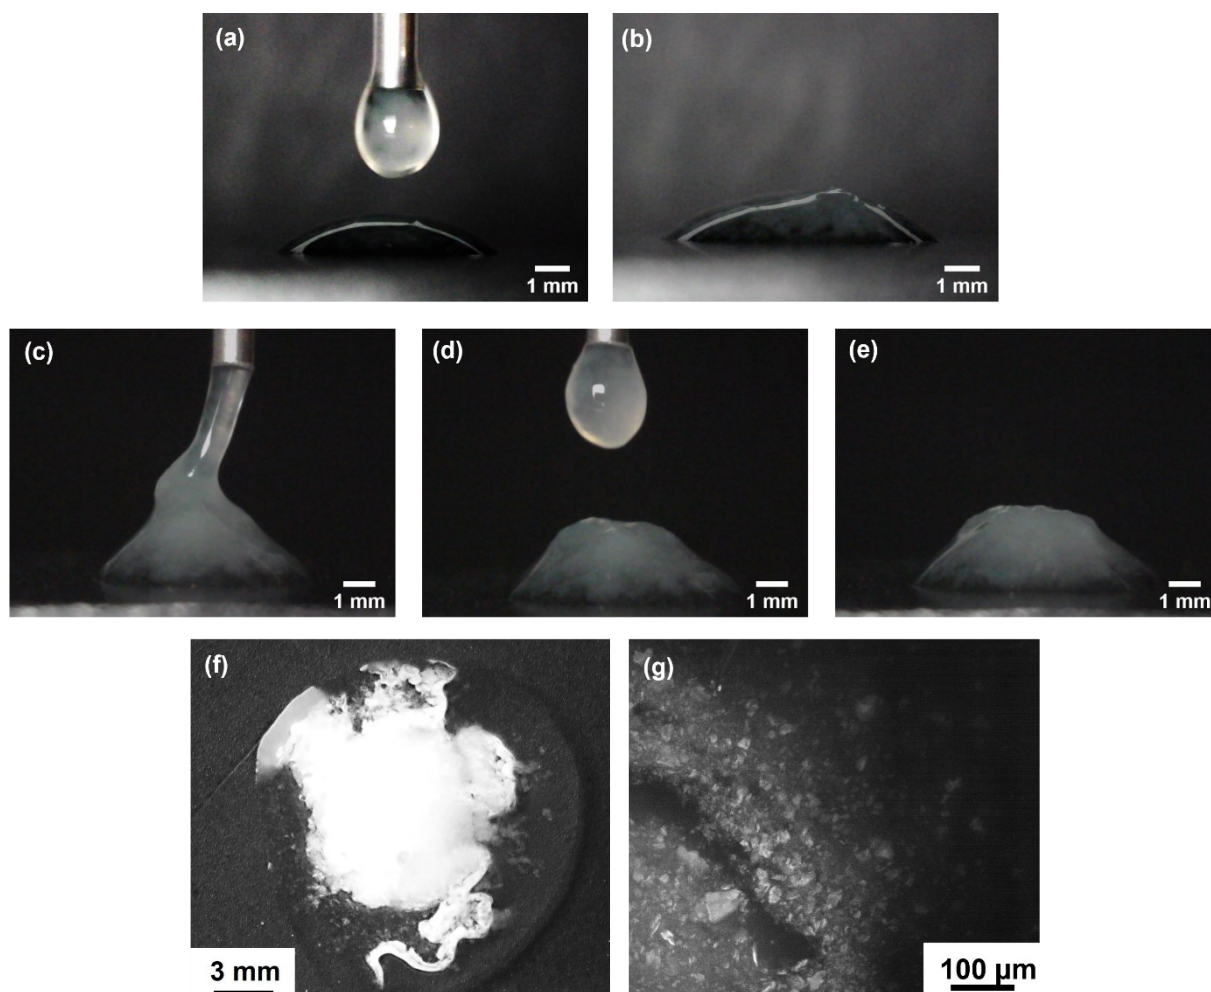

**Figure S1.** 3D-printed structures using hydrogels prepared from G-C18:1 (10 wt%) with a calcium ratio ( $\text{Ca}^{2+}/\text{G-C18:1}$ ) of  $\alpha = 0.30$ ; with a needle 3.8 cm long (a) during the process and (b) at the end; and with a needle 0.5 cm long (c, d) during the process and (e) at the end. Printing was performed using a needle with a 0.84 mm diameter at a flow rate of  $0.55 \text{ mm}^3/\text{s}$ . (f) Image of ( $\text{Ca}^{2+}/\text{G-C18:1}$ ) of  $\alpha = 0.3$  showing the exhibit phase separation (g) Confocal image (brightfield) of ( $\text{Ca}^{2+}/\text{G-C18:1}$ ) of  $\alpha = 0.3$  showing the hydrogel microstructure inhomogeneity.

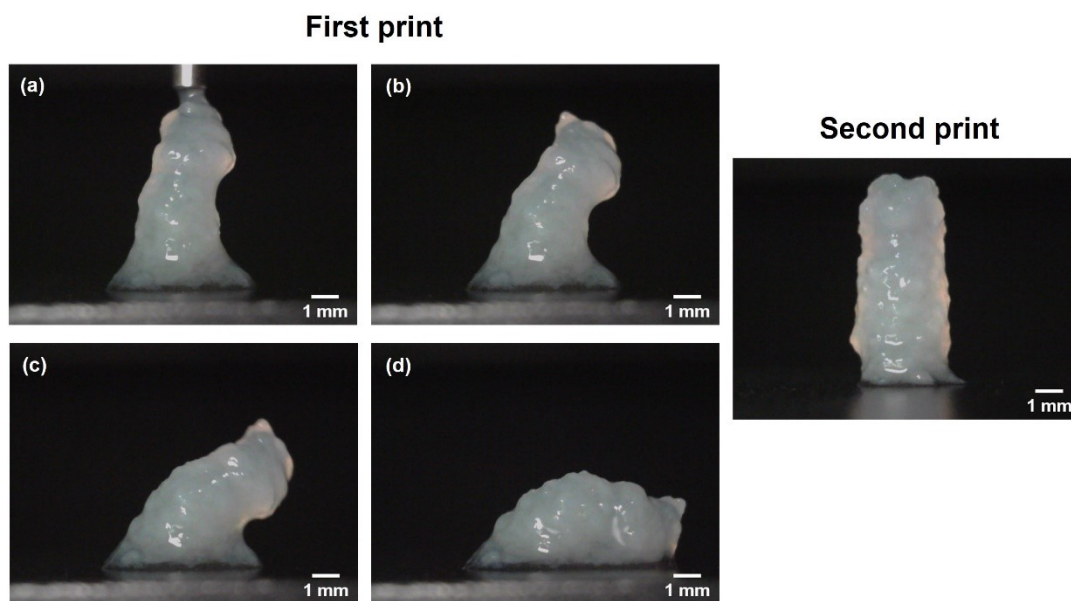

**Figure S2.** 3D-printed structures using hydrogels prepared from G-C18:1 (10 wt%) with a calcium ratio ( $\text{Ca}^{2+}/\text{G-C18:1}$ ) of  $\alpha = 0.60$  in the first print (a-d) and second printing attempt. Printing was performed using a needle with a 0.84 mm diameter and 0.5 cm length at a flow rate of  $0.55 \text{ mm}^3/\text{s}$ .

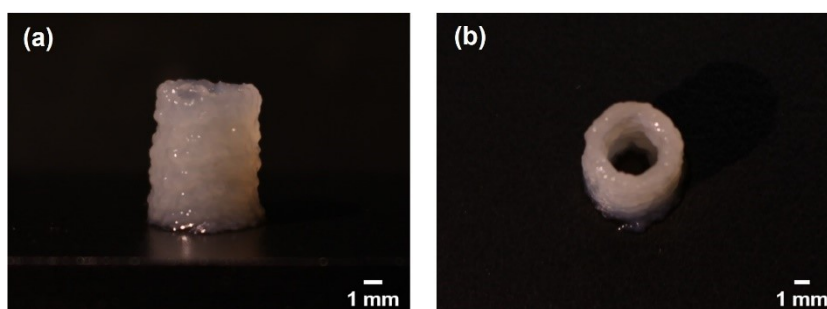

**Figure S3.** 3D-printed of a hollow cylinder using hydrogels prepared from G-C18:1 (10 wt%) with a calcium ratio ( $\text{Ca}^{2+}/\text{G-C18:1}$ ) of  $\alpha = 0.60$  (a) Top view (b) Top view. Printing was performed using a needle with a 0.84 mm diameter and 0.5 cm length at a flow rate of  $0.55 \text{ mm}^3/\text{s}$ .

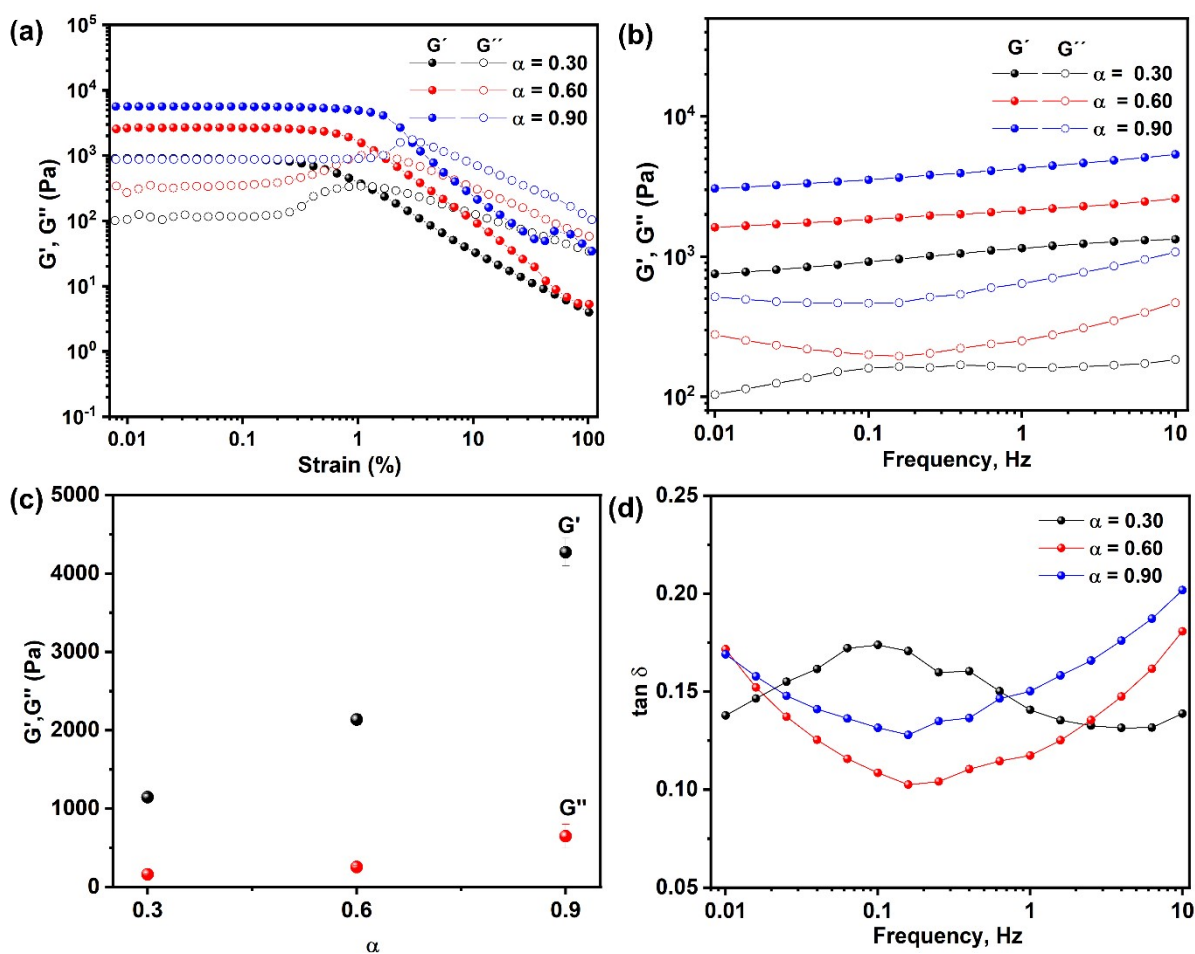

**Figure S4.** Rheological analysis of hydrogels prepared from G-C18:1 (10 wt%) with different calcium ratios ( $\text{Ca}^{2+}/\text{G-C18:1}$ ) of  $\alpha = 0.3$ ,  $0.6$ , and  $0.9$  (a) Storage ( $G'$ ) and loss ( $G''$ ) moduli was measured in the oscillatory strain at 1 Hz; (b) Storage ( $G'$ ) and loss ( $G''$ ) moduli was measured in the oscillatory frequency at 0.1%; (c) Storage ( $G'$ ) and loss ( $G''$ ) moduli as a function of  $\alpha$ ; (d)  $\tan \delta$  was measured in the oscillatory frequency at 0.1%.
